# Supplementary material
Source: Springer Nature journal article supplement (https://www.springermedizin.de/resource/supplementary/13023_2014_750_MOESM11_ESM.pdf/9642974)

Relative fold change  
in gene expression

ICF1

ICF2

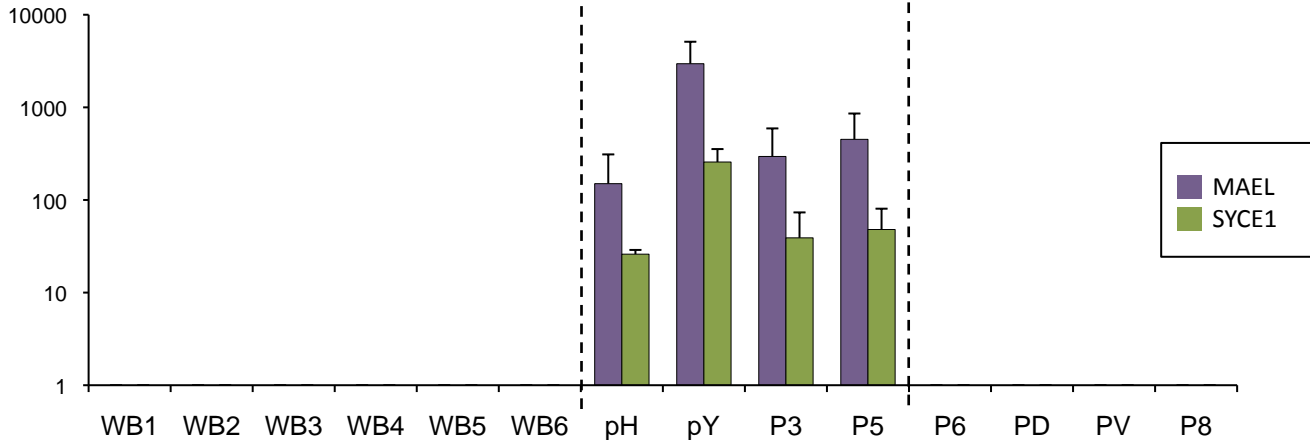

Supplement: MOESM11 [file 9642974]
